# Supplementary material for: Association of Prenatal Maternal Anemia with Tics and Tourette’s Syndrome in Offspring
Source: MDPI journal article supplement (doi:10.3390/jpm11101038), 2021-10-17
Supplement: s1 [file s1]

**Supplementary Table S1.** Selected Characteristics by Maternal Anemia Exposure in the Youth Cohort with Exact Number for Groups

|                                   | <b>All exposed<br/>(n=153,854)</b> | <b>Exposed, GA<sup>1</sup> ≤12 week<br/>(n=37,832)</b> | <b>Exposed, GA<sup>1</sup> &gt;12 week<br/>(n =116,022)</b> | <b>Unexposed<br/>(n=2,014,619)</b> |
|-----------------------------------|------------------------------------|--------------------------------------------------------|-------------------------------------------------------------|------------------------------------|
|                                   | Mean (SD)                          | Mean (SD)                                              | Mean (SD)                                                   | Mean (SD)                          |
| GA <sup>1</sup> , mean (SD), week | 38.27 (1.59)                       | 38.21 (1.71)                                           | 38.29 (1.55)                                                | 38.31 (1.66)                       |
| Birth weight, mean (SD), g        | 3048.79 (444.34)                   | 3037.62 (458.41)                                       | 3052.43 (439.59)                                            | 3068.99 (451.9)                    |
| Age, mean (SD), years             | 5.49 (3.63)                        | 5.64 (3.34)                                            | 5.44 (3.72)                                                 | 6.75 (3.71)                        |
| Child Sex                         | N                                  | N                                                      | N                                                           | N                                  |
| Male                              | 79213                              | 19563                                                  | 59650                                                       | 1047648                            |
| Female                            | 74641                              | 18269                                                  | 56372                                                       | 966971                             |
| Birth order                       |                                    |                                                        |                                                             |                                    |
| 1                                 | 94991                              | 23842                                                  | 71149                                                       | 1315410                            |
| 2                                 | 49500                              | 11977                                                  | 37523                                                       | 612784                             |
| ≥3                                | 9363                               | 2013                                                   | 7350                                                        | 86425                              |
| Maternal age                      |                                    |                                                        |                                                             |                                    |
| <20                               | 4090                               | 601                                                    | 3489                                                        | 39430                              |
| 20-24                             | 20533                              | 4563                                                   | 15970                                                       | 237884                             |
| 25-29                             | 48873                              | 12578                                                  | 36295                                                       | 638248                             |
| 30-34                             | 54909                              | 14223                                                  | 40686                                                       | 754647                             |
| 35-39                             | 21983                              | 5106                                                   | 16877                                                       | 300131                             |
| ≥40                               | 3466                               | 761                                                    | 2705                                                        | 44279                              |
| Smoking during pregnancy          | 125                                | 31                                                     | 93                                                          | 1430                               |
| Alcohol use during pregnancy      | 18                                 | 5                                                      | 13                                                          | 181                                |
| Low income                        | 10446                              | 1979                                                   | 8467                                                        | 99864                              |
| Tic disorder                      | 1575                               | 450                                                    | 1125                                                        | 26626                              |
